# Supplementary material
Source: MDPI journal article supplement (https://www.mdpi.com/2077-0472/13/3/596)
Supplement: s1 [file s1]

Supplementary sheet for Descriptors

| Character                            | Code | Unit                                                    |
|--------------------------------------|------|---------------------------------------------------------|
| <b>Numeric Descriptors</b>           |      |                                                         |
| Days to 50% flowering                | DF   | days                                                    |
| Plant height                         | PH   | cm                                                      |
| Days to maturity                     | DM   | days                                                    |
| 100-seed weight                      | SW   | g                                                       |
| Biological yield plant <sup>-1</sup> | BYP  | g/plant                                                 |
| Primary branch plant <sup>-1</sup>   | PB   | number                                                  |
| Secondary branch plant <sup>-1</sup> | SB   | number                                                  |
| Pods plant <sup>-1</sup>             | PPP  | number                                                  |
| Yield plant <sup>-1</sup>            | YPP  | g/plant                                                 |
| Plant height at lowest pod           | PHLP | cm                                                      |
| <b>Binary Descriptors</b>            |      |                                                         |
| Stem pigmentation                    | SP   | absent=1, present=2                                     |
| Tendrils length                      | TL   | rudimentary=1,<br>prominent=2                           |
| Pod pigmentation                     | PP   | absent=1, present=2                                     |
| Cotyledon colour                     | CC   | yellow=1, red=2                                         |
| <b>Ordinal Descriptors</b>           |      |                                                         |
| Seedling vigour                      | SV   | poor=1, medium=2,<br>good=3, very<br>good=4             |
| Leaf size                            | LS   | small=1, medium=2,<br>large=3                           |
| Leaf pubescence                      | LP   | low=1, medium=2,<br>high=3                              |
| Plant growth habit                   | PGH  | erect=1,<br>horizontal=2                                |
| Early Growth Vigour                  | EGV  | poor=1,<br>good = 2,<br>very good = 3                   |
| Seed coat color                      | SCC  | black=1,<br>grey=2,<br>pink=3,<br>brown=4               |
| Leaf colour                          | LC   | light green=1, ash<br>green=2, green=3,<br>dark green=4 |
